# Supplementary material for: Fungal Methane Production Under High Hydrostatic Pressure in Deep Subseafloor Sediments
Source: Preprints.org preprint supplement (doi:10.20944/preprints202408.0914.v1), 2024-08-13
Supplement: Supplementary file 2 [file supplementary]

**Supplementary material**

**Fungal Methane Production Under High Hydrostatic Pressure in Deep Subseafloor Sediments**

Mengshi Zhaoa, Dongxu Li a, Jie Liub, Jiasong Fangbc*, Changhong Liu a,*

aState Key Laboratory of Pharmaceutical Biotechnology, Nanjing University, Nanjing 210023, China

bShanghai Engineering Research Center of Hadal Science and Technology, College of Marine Sciences, Shanghai Ocean University, Shanghai 201306, PR China

cLaboratory for Marine Biology and Biotechnology, Qingdao National Laboratory for Marine Science and Technology, Qingdao 266237, China

*Correspondence:

Jiasong Fang

jsfang@shou.edu.cn

Changhong Liu

chliu@nju.edu.cn

**Table S1.** Transcriptome quality control analysis

| **Sample_ID** | **Raw_reads** | **Raw_bases** | **Clean_reads** | **Clean_Bases** | **Q20%** | **Q30%** |
| --- | --- | --- | --- | --- | --- | --- |
| d1_01M1 | 61225688 | 9245078888 | 59924560 | 8923556763 | 98.59 | 95.67 |
| d1_01M2 | 57660352 | 8706713152 | 57093920 | 8492669667 | 98.63 | 95.76 |
| d1_01M3 | 78692462 | 11882561762 | 77966734 | 11574682555 | 98.72 | 96.03 |
| d1_15M1 | 58292626 | 8802186526 | 57372462 | 8546726611 | 98.41 | 95.32 |
| d1_15M2 | 57596182 | 8697023482 | 57148878 | 8523100243 | 98.38 | 95.23 |
| d1_15M3 | 65583050 | 9903040550 | 64891218 | 9628476854 | 98.4 | 95.33 |
| d1_35M1 | 62930370 | 9502485870 | 62248622 | 9273294662 | 98.38 | 95.28 |
| d1_35M2 | 50448150 | 7617670650 | 49998534 | 7475352356 | 98.3 | 95.02 |
| d1_35M3 | 49151190 | 7421829690 | 48754856 | 7270718571 | 98.46 | 95.42 |
| d3_01M1 | 50533726 | 7630592626 | 48120520 | 7154045635 | 98.48 | 95.36 |
| d3_01M2 | 57806778 | 8728823478 | 55059002 | 8197060519 | 98.6 | 95.7 |
| d3_01M3 | 57385564 | 8665220164 | 56966126 | 8507516649 | 98.71 | 95.98 |
| d3_15M1 | 61646368 | 9308601568 | 61022202 | 9085820646 | 98.47 | 95.54 |
| d3_15M2 | 65798042 | 9935504342 | 65238428 | 9738132671 | 98.39 | 95.29 |
| d3_15M3 | 56952974 | 8599899074 | 56250886 | 8366846120 | 98.46 | 95.49 |
| d3_35M1 | 61443184 | 9277920784 | 60730442 | 9069017317 | 98.4 | 95.34 |
| d3_35M2 | 47487154 | 7170560254 | 46292670 | 6938107353 | 98.36 | 95.23 |
| d3_35M3 | 47088886 | 7110421786 | 46439164 | 6913881206 | 98.39 | 95.33 |
| d5_01M1 | 57971786 | 8753739686 | 57444428 | 8573357523 | 98.74 | 96.03 |
| d5_01M2 | 46008078 | 6947219778 | 45531714 | 6851055859 | 98.58 | 95.59 |
| d5_01M3 | 52839130 | 7978708630 | 52454630 | 7886413231 | 98.78 | 96.16 |
| d5_15M1 | 61865750 | 9341728250 | 61253746 | 9122127602 | 98.42 | 95.33 |
| d5_15M2 | 50901704 | 7686157304 | 50333004 | 7484406434 | 98.51 | 95.6 |
| d5_15M3 | 49558750 | 7483371250 | 49052310 | 7267314405 | 98.51 | 95.66 |
| d5_35M1 | 44510344 | 6721061944 | 43941122 | 6551168123 | 98.5 | 95.58 |
| d5_35M2 | 43622492 | 6586996292 | 43113272 | 6448029277 | 98.56 | 95.7 |
| d5_35M3 | 49276522 | 7440754822 | 48618848 | 7253078402 | 98.52 | 95.66 |

Note: d1_01, d3_01, d5_01 respectively represent strains grown at 0.1MPa for one, three and five days ; d1_15, d3_15, d5_15 respectively represent strains grown at 15 MPa for one, three and five days;d1_35, d3_35, d5_35 respectively represent strains grown at 35 MPa for one, three and five days;Q20: The percentage of bases in clean reads with a Phred value >20; Q30: The percentage of bases in clean reads with a Phred value >30.

**Table S2.** qRT-PCR primers

| **Primer ID** | **Sequence (5'-3')** |
| --- | --- |
| mct1-F | ATTCCTGGGATATTGCATGG |
| mct1-R | GTCGAATATGCGAGTTAGCTC |
| mct2-F | CTCCGGGACCAGAGACAGTT |
| mct2-R | AGCCAGGGGTGATGTTCTTG |
| dh1-F | GAATCTCGCCGCTACCAACT |
| dh1-R | GACGAGAACGCTGATCCAGTA |
| dh2-F | GTTGGCCGGACTCAACACTA |
| dh2-R | GTTCACCAACAAGCGCACAT |
| dh3-F | TCACTCCCCAGCCCAACC |
| dh3-R | GCTTGTCCGTCTCGCCG |
| dh4-F | GGCGGCACCAAATCGAATAC |
| dh4-R | TTGTACCAGTTGAGCGGACC |
| dh5-F | TTCCAGAAGGGCGGTCTGA |
| dh5-R | GGCTTCGTGACTTTGAGGGT |
| ms-F | CATCCCCAGCGGTGATTTCT |
| ms-R | GGCCCATCGCAAAGTAGACA |
| act-F | GTCCGCCCTCGAGAAGAGTTA |
| act-R | TTGTACGTCGTCTCGTGGATA |


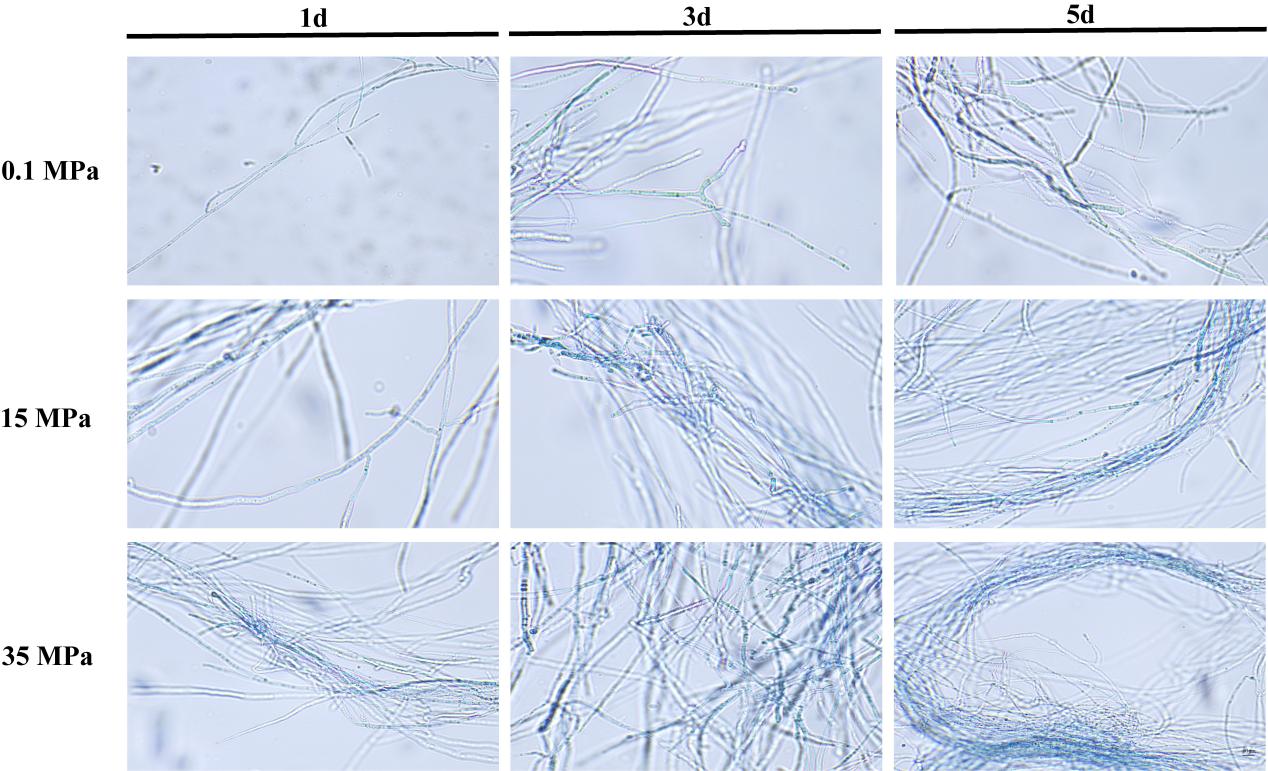


**Figure S1.** *S. commune* 20R-7-F01 cell activity under high hydrostatic pressure

**Table S3.** Intracellular O2- and OH· levels of *S. commune* 20R-7-F01 under different stress conditions

|  | **O2- ( μmol/g )** | | | **OH· ( μmol/g )** | | |
| --- | --- | --- | --- | --- | --- | --- |
| **0.1MPa** | **15MPa** | **35MPa** | **0.1MPa** | **15MPa** | **35MPa** |
| 1d | 0.21 ± 0.01 | 0.24 ± 0.02 | 0.34 ± 0.03 | 0.13±0.01 | 0.19±0.02 | 0.13±0.01 |
| 3d | 0.33 ± 0.05 | 0.26 ± 0.01 | 0.37 ± 0.01 | 0.16±0.02 | 0.16±0.03 | 0.14±0.03 |
| 5d | 0.25 ± 0.01 | 0.31 ± 0.01 | 0.35 ± 0.02 | 0.17±0.03 | 0.21±0.02 | 0.25±0.04 |

**Table S4.** Intracellular ROS levels of *S. commune* 20R-7-F01 under different stress conditions

|  | **CdCl2** | | | **H2O2** | | |
| --- | --- | --- | --- | --- | --- | --- |
| **0.75mM** | **1.5mM** | **3mM** | **0.75mM** | **1.5mM** | **3mM** |
| 1d | 1.13 ± 0.21 | 2.31 ± 0.52 | 2.92 ± 0.55 | 1.81 ± 0.31 | 2.54 ± 0.46 | 3.17 ± 0.65 |
| 3d | 2.23 ± 0.18 | 4.78 ± 0.27 | 5.42 ± 0.46 | 2.74 ± 0.25 | 5.23 ± 0.60 | 7.12 ± 0.33 |
| 5d | 3.99 ± 0.16 | 6.82 ± 0.37 | 8.15 ± 0.32 | 4.95 ± 0.45 | 8.65 ± 0.61 | 10.29 ± 0.47 |


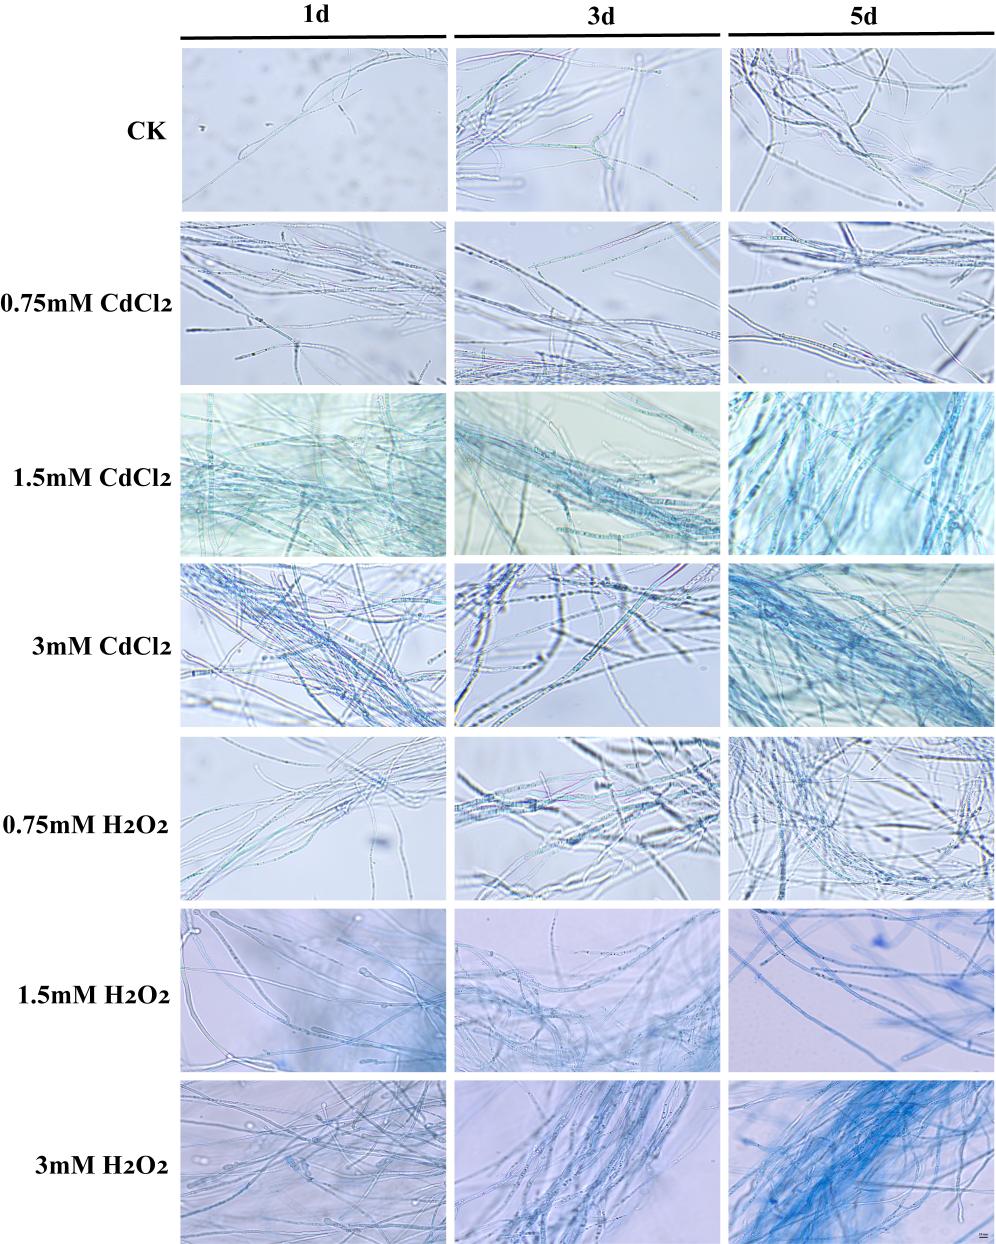


**Figure S2.** *S. commune* 20R-7-F01 cell activity under different stress conditions


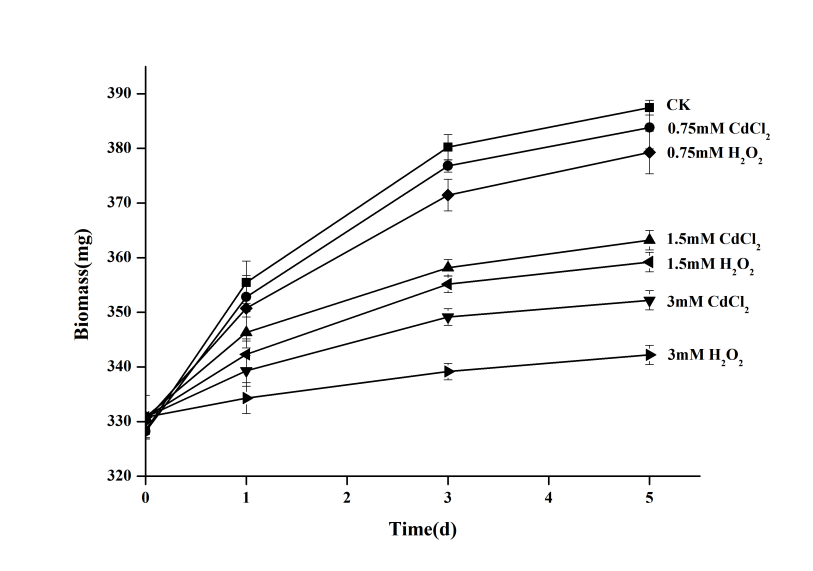


**Figure S3.** Alterations in the biomass of *S. commune* 20R-7-F01 under varying stress conditions.
